# Supplementary material
Source: PubMed Central journal article supplement (PMC8201910)

SupplementalFigure 1

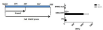

Supplement: NIHMS1705552-supplement-Supple_fig_1.pdf [file NIHMS1705552-supplement-Supple_fig_1.pdf]
